# Supplementary material for: Changes in saliva analytes in equine acute abdominal disease: a sialochemistry approach
Source: PubMed Central journal article supplement (PMC6554884; doi:10.1186/s12917-019-1933-6), 2019-06-06

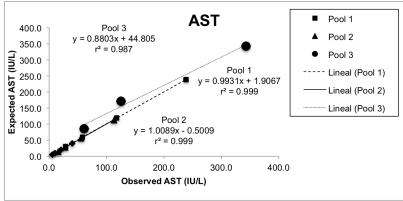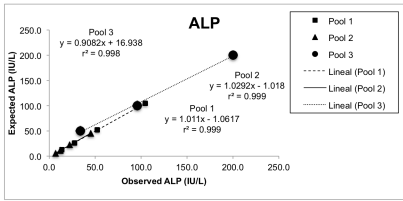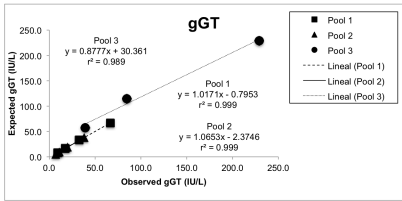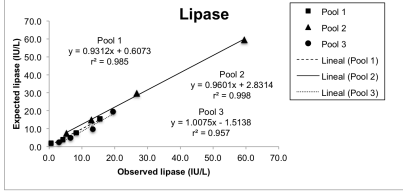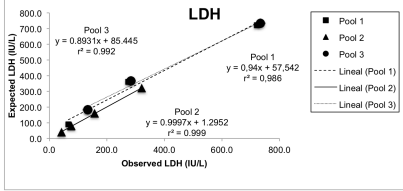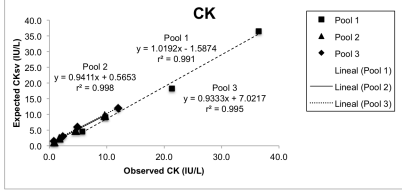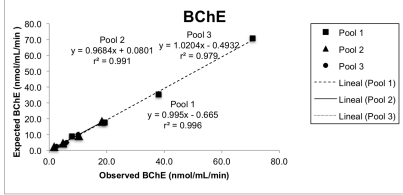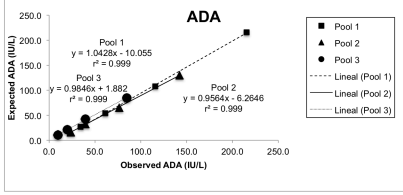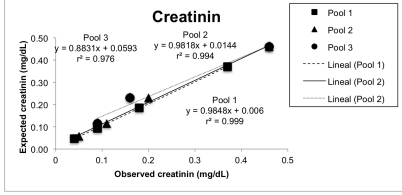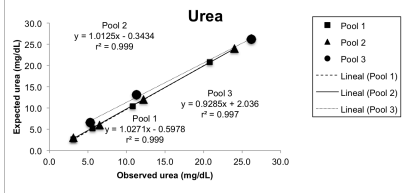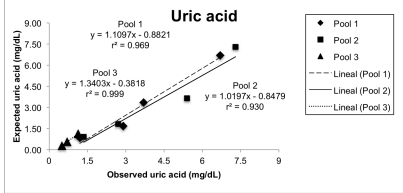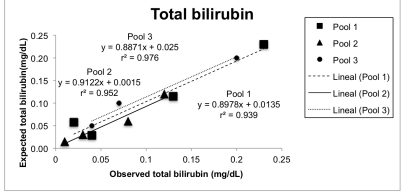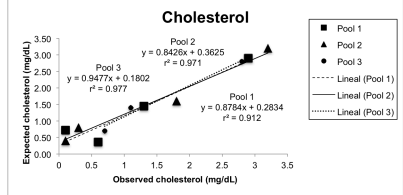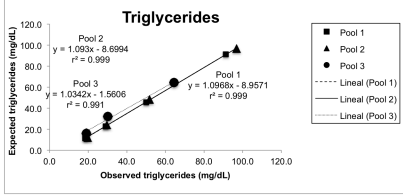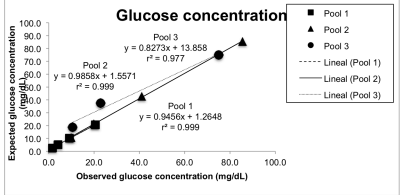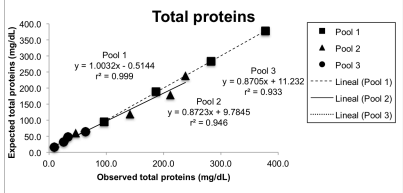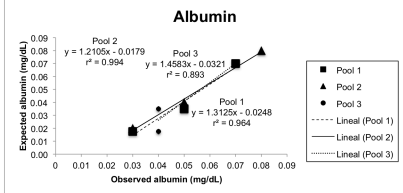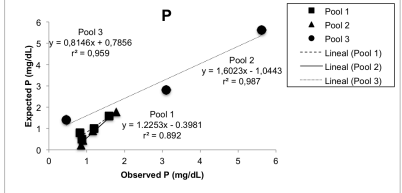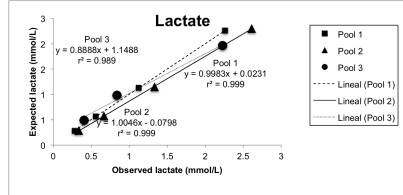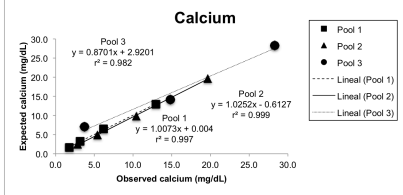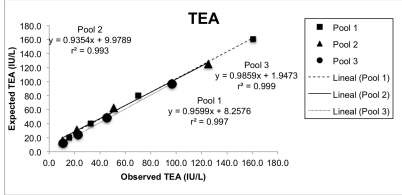

Supplement: 12917_2019_1933_MOESM2_ESM.pdf [file 12917_2019_1933_MOESM2_ESM.pdf]
